# Supplementary material for: Silver nanoparticle enhanced metal-organic matrix with interface-engineering for efficient photocatalytic hydrogen evolution
Source: PubMed Central journal article supplement (PMC9892045; doi:10.1038/s41467-023-35981-8), 2023-02-01
Supplement: 41467_2023_35981_MOESM1_ESM.pdf [file 41467_2023_35981_MOESM1_ESM.pdf]

## Supplementary Information

### **Silver Nanoparticle Enhanced Metal-organic Matrix with Interface-engineering for Efficient Photocatalytic Hydrogen Evolution**

Yannan Liu<sup>1,2</sup>, Cheng-Hao Liu<sup>3</sup>, Tushar Debnath<sup>4</sup>, Yong Wang<sup>1</sup>, Darius Pohl<sup>2,5</sup>, Lucas V. Besteiro<sup>6</sup>, Debora Motta Meira<sup>7,8</sup>, Shengyun Huang<sup>1</sup>, Fan Yang<sup>9</sup>, Bernd Rellinghaus<sup>2,5</sup>, Mohamed Chaker<sup>1</sup>, Dmytro F. Perepichka<sup>3</sup> & Dongling Ma<sup>1,\*</sup>

<sup>1</sup>Énergie Matériaux et Télécommunications, Institut National de la Recherche Scientifique (INRS)  
1650 Boul. Lionel-Boulet, Varennes, Quebec, J3X 1S2, Canada

<sup>2</sup> Currently at Center for Advancing Electronics Dresden (Cfaed), Technische Universität Dresden,  
01062, Dresden, Germany

<sup>3</sup> Department of Chemistry, McGill University, 801 Sherbrooke Street West, Montreal, Quebec, H3A  
0B8, Canada

<sup>4</sup> Chair for Photonics and Optoelectronics Nano-Institute Munich Department of Physics,  
Ludwig-Maximilians-University, Königinstr. 10, 80539, München, Germany

<sup>5</sup> Dresden Center for Nanoanalysis (DCN), 01062, Dresden, Germany

<sup>6</sup> CINBIO, Universidade de Vigo, 36310 Vigo, Spain

<sup>7</sup> CLS@APS sector 20, Advanced Photon Source, Argonne National Laboratory, 60439, Lemont, IL,  
USA.

<sup>8</sup> Canadian Light Source Inc., Saskatoon, SK, S7N 2V3, Canada.

<sup>9</sup> Department of Materials Science and Engineering, Stanford University, Stanford, CA, 94305, USA

\*Correspondence and requests for materials should be addressed to D.M. (e-mail: ma@emt.inrs.ca).

## **Table of Contents**

1. Supplementary Materials.
2. Instrumentation and Methods.
3. Results and Discussion.
4. Supplementary References.

## **1. Supplementary Materials.**

N,N-Dimethylformamide (DMF), ethanol ( $\geq 99.0\%$ ), polyvinylpyrrolidone (PVP), silver trifluoroacetate, acetonitrile, trifluoroacetic acid (TFA), 4,4'-Dipyridyl and triethanolamine ( $\geq 99.0\%$ ) were obtained from Sigma Company and used without further purification. Tetrakis (4-carboxyphenyl) porphyrin (TCPP) was purchased from TCI America. All of the water used in this work was ultrapure water.

## **2. Instrumentation and Methods.**

### **Transmission Electron Microscopy (TEM)**

TEM and high-resolution TEM (HR-TEM) were carried out in a JEOL JEM-2100F at a voltage of 200 kV. The TEM samples were prepared by dropping sample solutions onto lacey carbon-coated copper or nickel grids. Energy-dispersive X-ray spectrometry (EDS) analysis and selected area electron diffraction (SAED) were also conducted in the TEM system to probe the distribution of chemical elements or crystal diffraction in Ag-AgMOM.

### **Atomic Force Microscopy (AFM)**

The topography images and the corresponding height measurements of Ag-AgMOM samples were obtained on MultiMode 8 AFM (Bruker) in a tapping mode. Ag-AgMOM samples were placed on the Highest Grade V1 AFM Mica Discs (12 mm, Ted Pella, Inc.). The flatness of the mica discs is smaller than 1 nm, and the hardness is 80-105 shore test.

### **Ultraviolet-visible (UV-Vis) Absorption Spectroscopy**

The UV-Vis absorption spectra of solution samples were taken on a Cary 5000 UV-Vis spectrophotometer (Varian) in the range from 300 to 700 nm at 25 °C. A 1 cm quartz cuvette was used for the measurements.

### **Diffuse Reflectance Spectra (DRS)**

DRS measurements of powder samples were performed in a UV-Visible-PIR spectrometer (Perkin Elmer, Lambda 750) with an integrating sphere. The bandgap ( $E_g$ ) of Ag-AgMOM and TCPP samples was determined from DRS and the Tauc plots were derived from these measurements.

### **Raman Spectra**

The Raman spectra of TCPP, PVP and Ag-AgMOM samples were acquired by a Raman microscope (Renishaw, inVia Reflex), including an optical microscope (x5, x20 and x50) coupled to a Raman spectrometer. The excitation laser wavelength was 532 nm. The optical microscope is used to enlarge and identify the sample areas, and the Raman spectrometer measures the vibrations under excitation.

### **Fourier-transform Infrared Spectroscopy (FTIR)**

FTIR spectra of samples were recorded on a Thermo Scientific spectrometer to identify the structure of samples from 400 to 4000  $\text{cm}^{-1}$ .

### **Neutron Activation Analysis (NAA)**

NAA was carried out using a SLOWPOKE nuclear reactor to detect the concentration of Ag element in Ag-AgMOM samples.

### **Inductively Coupled Plasma Optical Emission Spectroscopy (ICP-OES)**



ICP-OES measurements were conducted on an Agilent Technologies, 5100 spectrometer for the determination of Ag mass percentage in Ag-AgMOM and Ag-CuMOM samples. The method consists of ionizing the sample by injecting an argon plasma (temperature ca. 6000K). The standard Ag plasma solution (Specpure®) was purchased from Alfa Aesar. The Ag-AgMOM solution was prepared by acidic digestion of Ag-AgMOM in 5% of HNO<sub>3</sub> water solution. A clear aqueous solution containing the dissolved sample was obtained at the end. The solution was then injected into the plasma in the form of a fine aerosol, generated by a pneumatic device (nebulizer).

### **X-ray Photoelectron Spectroscopy (XPS)**

XPS measurements of samples were performed on a VG Escalab 220i-XL equipped with an Al-K $\alpha$ X-ray source. The obtained spectra were calibrated using the C 1s peak at the position of 284.6 eV. Operando XPS was conducted by combining it with a 420 nm light-emitting diode (LED, 20W) during measurements.

### **Powder X-ray Diffraction (PXRD)**

PXRD (PANalytical X'Pert MRD) equipped with a Cu K $\alpha$  radiation source ( $\lambda = 0.15406$  nm) was used to explore the crystal structures of samples. PXRD analysis was conducted using the Reflex module in Materials Studio 2019. Two-dimensional PXRD simulation was conducted using numerical integration of real space of a finite system reported by literature.<sup>1</sup> All 3D simulated PXRD patterns are generated with the default setting (i.e., no broadenings/shifts, standard Cu source) in Materials Studio.

### **Brunauer-Emmett-Teller (BET) measurements**

Nitrogen adsorption-desorption isotherm measurements were conducted on Micromeritics Instrument Corporation TriStar II 3020 3.02 TriStar II 3020 from 0 to 1 atm at 77 K. The Brunauer-Emmett-Teller (BET) method was utilized to calculate the specific surface areas. And

non-local density functional theory (NLDFT) model was used to determine the pore sizes and volumes. The pore size distribution of simulated AgMOM was performed using software of PoreBlazer (v4.0).

### 3. Results and Discussion.

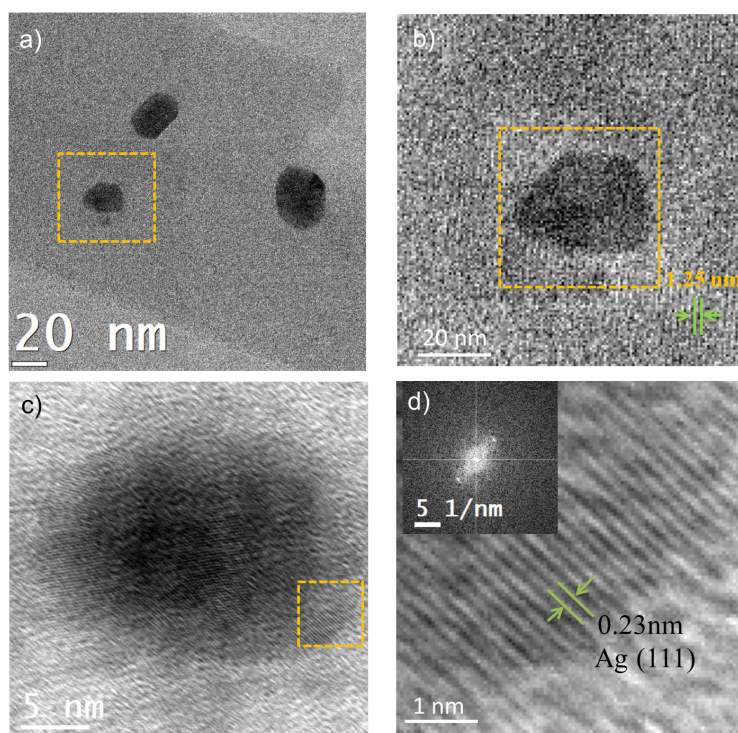

**Supplementary Fig. 1** (a,b) Enlarged TEM images of Ag-AgMOM; the lattice of AgMOM can be observed. (c,d) HR-TEM images and crystal lattice of a single AgNP on MOM. Inset in (d) is the fast Fourier transform image of the AgNP.

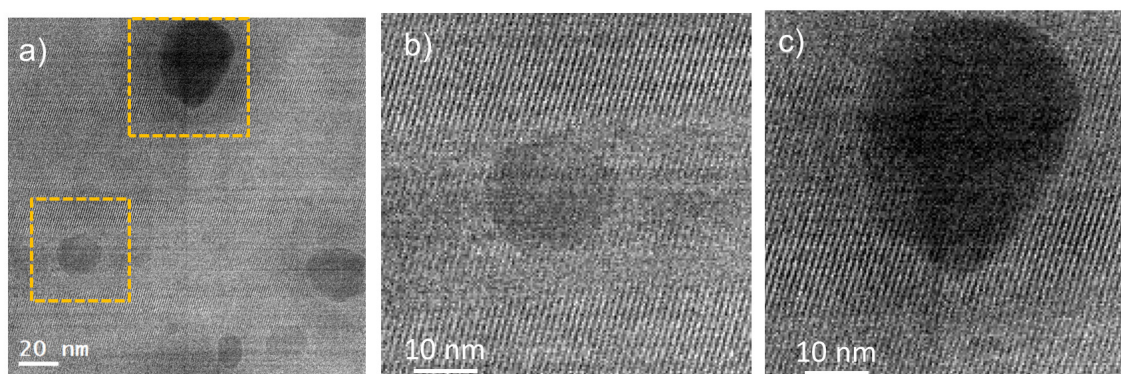

**Supplementary Fig. 2** (a) TEM image of Ag-AgMOM and (b,c) HR-TEM images of Ag-AgMOM highlighted in a). The clear lattice of the AgMOM can be observed around Ag NPs, suggesting an ordered structure of the AgMOM.

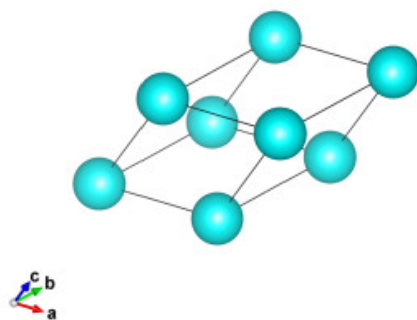

**Supplementary Fig. 3** The primitive cubic crystal structure model of AgNPs in Ag-porphyrin MOM with the space group of  $Fm\bar{3}m$ .

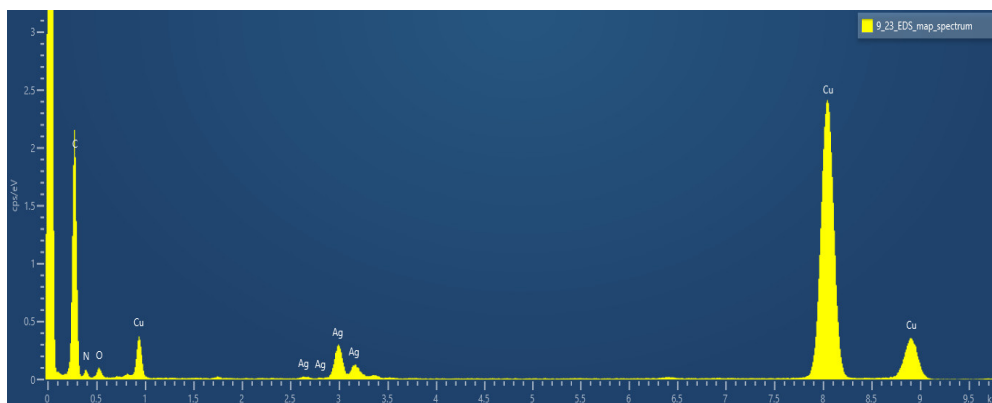

**Supplementary Fig. 4** Energy-dispersive X-ray spectroscopy (EDS) spectrum of Ag-AgMOM (Cu signal comes from the Cu grid).

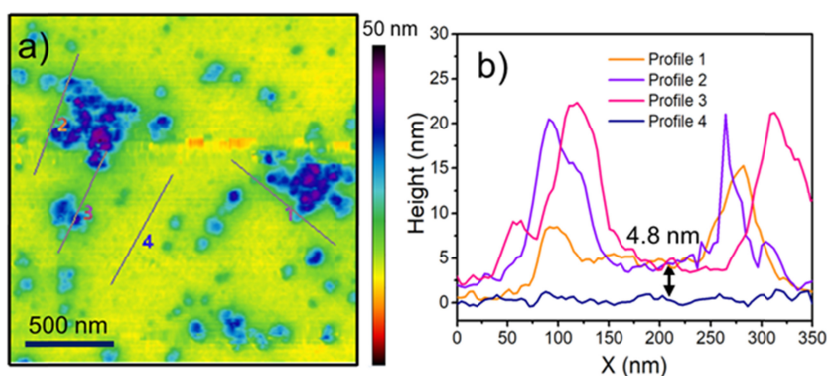

**Supplementary Fig. 5** (a) AFM image of Ag-AgMOM on the highest grade AFM mica disc. (b) Height profiles of the AgMOM in Ag-AgMOM.

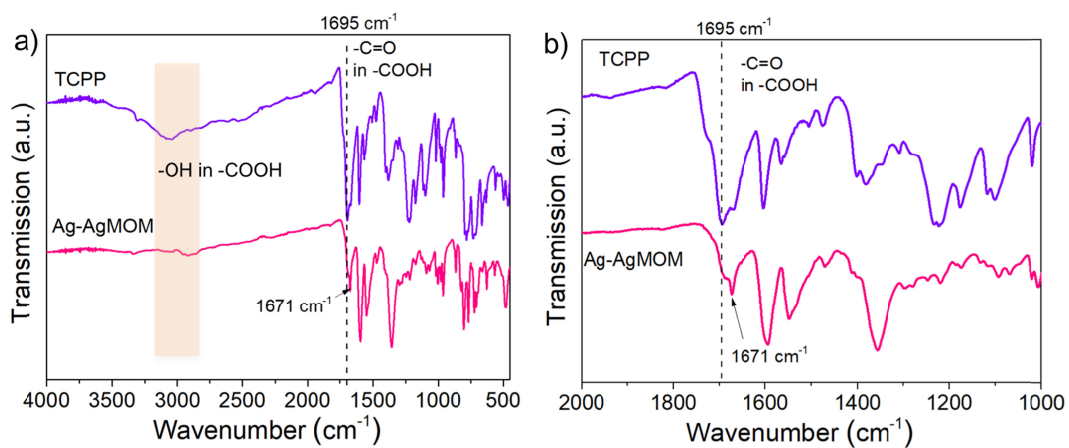

**Supplementary Fig. 6** (a) Experimental FTIR spectra of Ag-AgMOM and TCPP. (b) is the enlarged spectra range from 1000 ~ 2000  $\text{cm}^{-1}$ .

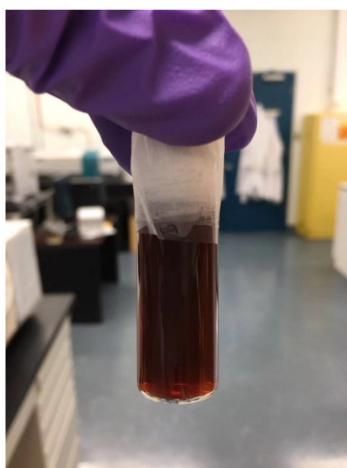

**Supplementary Fig. 7** Photograph of dispersion of Ag-AgMOM in water after 1 month storage at 4  $^{\circ}\text{C}$ , confirming its long term colloidal stability.

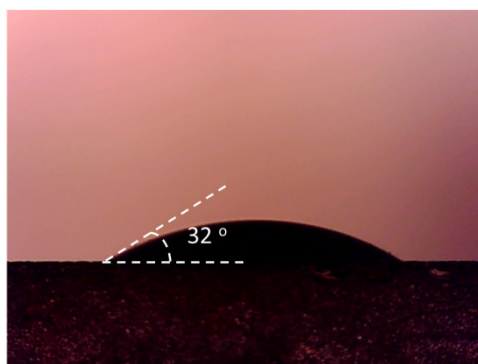

**Supplementary Fig. 8** Water contact angle of the Ag-AgMOM film.

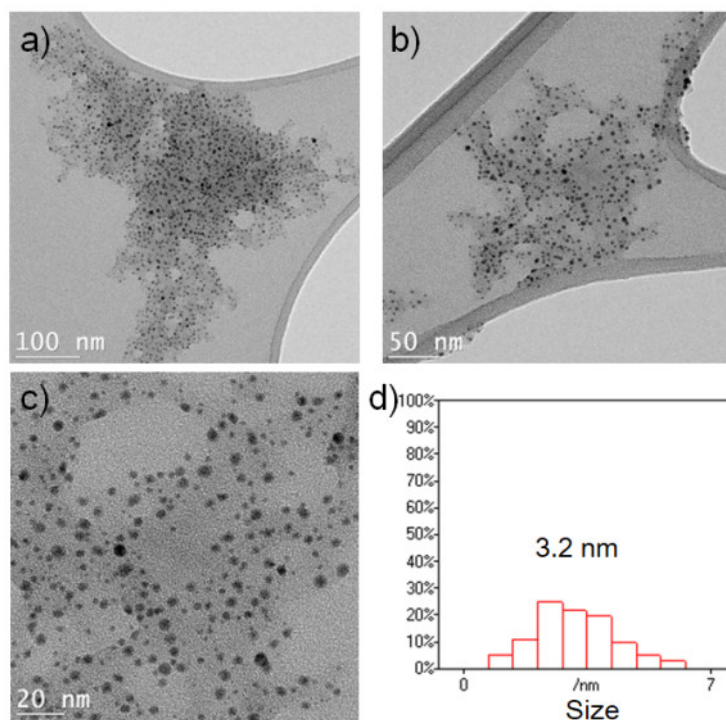

**Supplementary Fig. 9** (a-c) Typical TEM images of Ag-AgMOM and (d) the size distribution histogram of AgNPs synthesized under the conditions of  $m_{\text{Ag}^+}/m_{\text{TCPP}}=1:1$  and reaction time of 1 h.

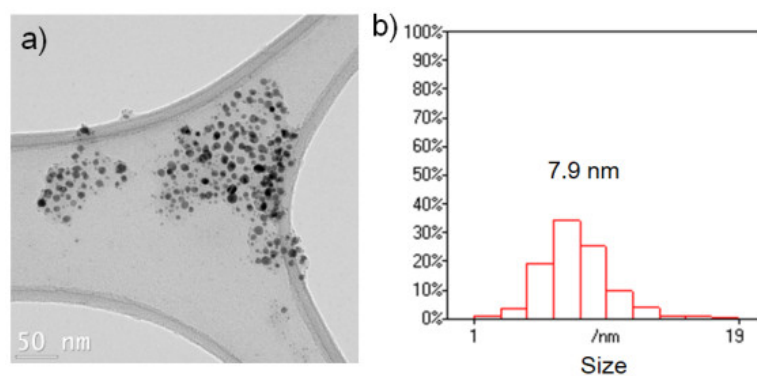

**Supplementary Fig. 10** (a) Typical TEM image of Ag-AgMOM and (b) the size distribution histogram of AgNPs synthesized under the conditions of  $m_{\text{Ag}^+}/m_{\text{TCPP}}=1:1$  and reaction time of 4 h.



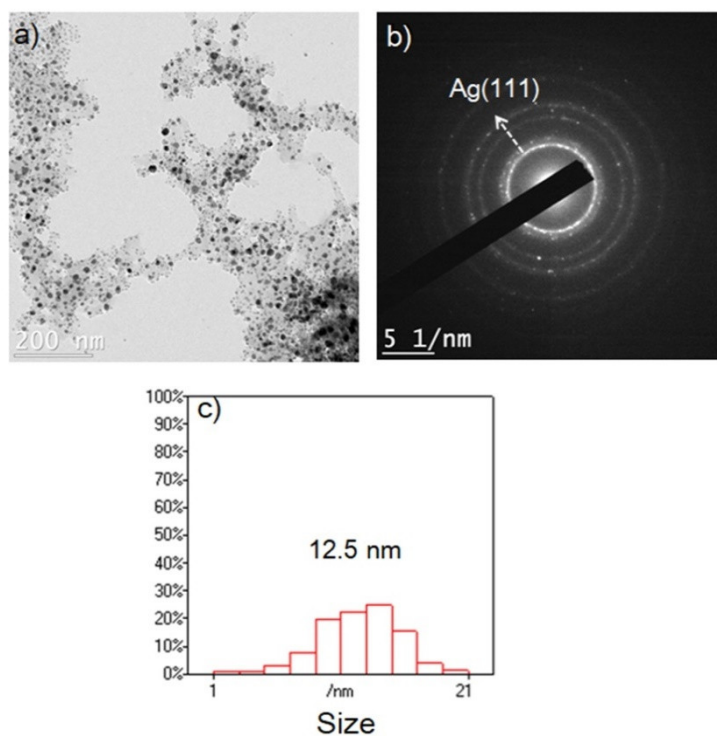

**Supplementary Fig. 11** (a) Typical TEM images, (b) SAED of Ag-AgMOM, and (c) the size distribution histogram of AgNPs synthesized under the conditions of  $m_{\text{Ag}^+}/m_{\text{TCPP}}=1:1$  and reaction time of 20 h.

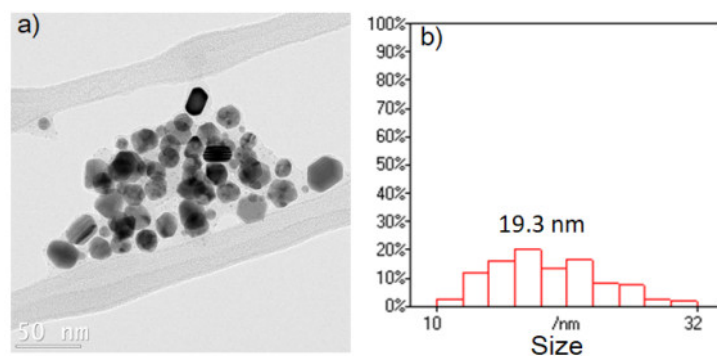

**Supplementary Fig. 12** (a) Typical TEM image of Ag-AgMOM and (b) the size distribution histogram of AgNPs synthesized under the conditions of  $m_{\text{Ag}^+}/m_{\text{TCPP}}=1:1$  and reaction time of 36 h.

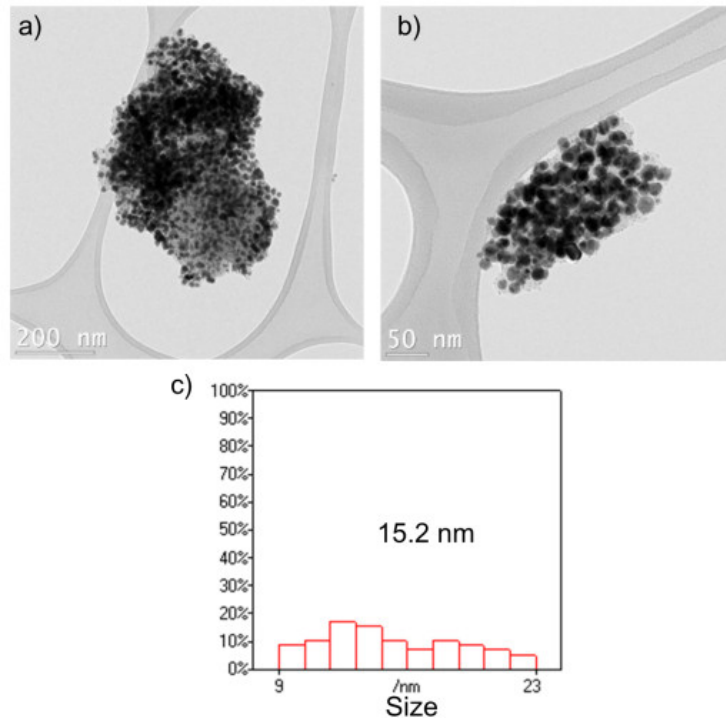

**Supplementary Fig. 13** (a,b) Typical TEM images of Ag-AgMOM and (c) the size distribution histogram of AgNPs synthesized under the conditions of  $m_{\text{Ag}^+}/m_{\text{TCPP}}=2:1$  and reaction time of 28 h.

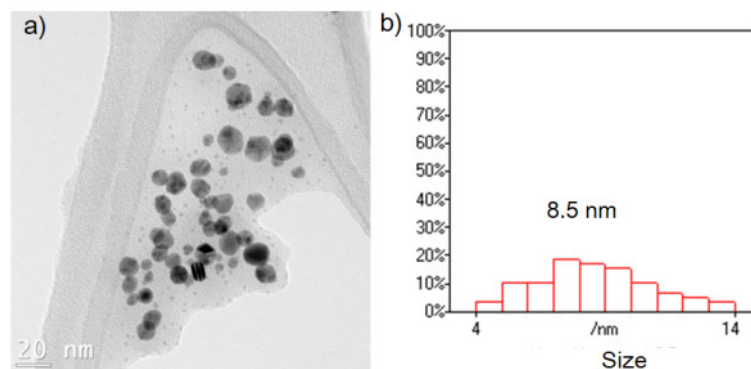

**Supplementary Fig. 14** (a) Typical TEM image of Ag-AgMOM and (b) the size distribution histogram of AgNPs synthesized under the conditions of  $m_{\text{Ag}^+}/m_{\text{TCPP}}=1:4$  and reaction time of 28 h.

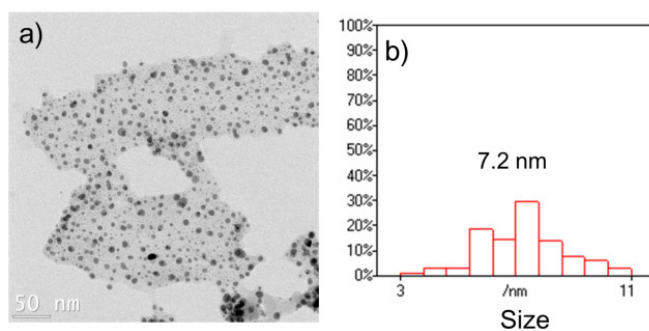

**Supplementary Fig. 15** (a) Typical TEM image of Ag-AgMOM and (b) the size distribution histogram of AgNPs synthesized under the conditions of  $m_{\text{Ag}^+}/m_{\text{TCCP}}=1:2$  and reaction time of 4 h.

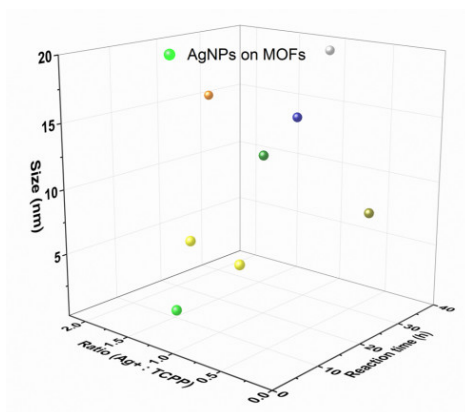

**Supplementary Fig. 16** The statistically measured average size of AgNPs on Ag-porphyrin MOM synthesized under different reaction time and feeding ratios, without using any regulating agent.

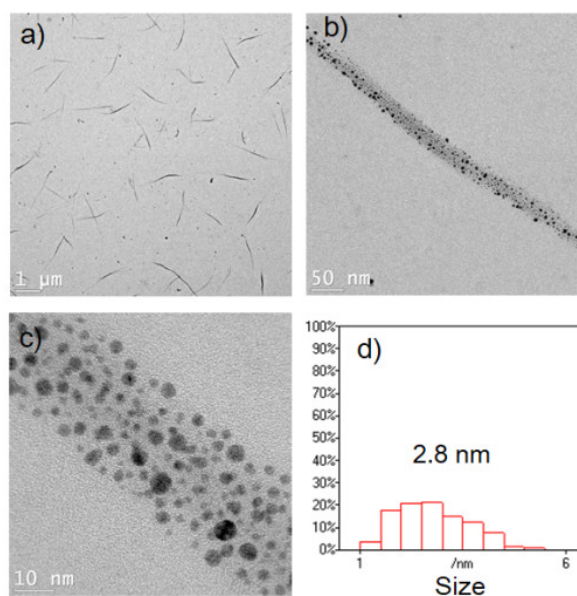

**Supplementary Fig. 17** (a-c) Typical TEM images of Ag-AgMOM and (d) the size distribution of AgNPs under  $m_{\text{Ag}^+}/m_{\text{TCCP}}=1:1$ , reaction time of 28 h with 100 μL TFA as a regulating agent.



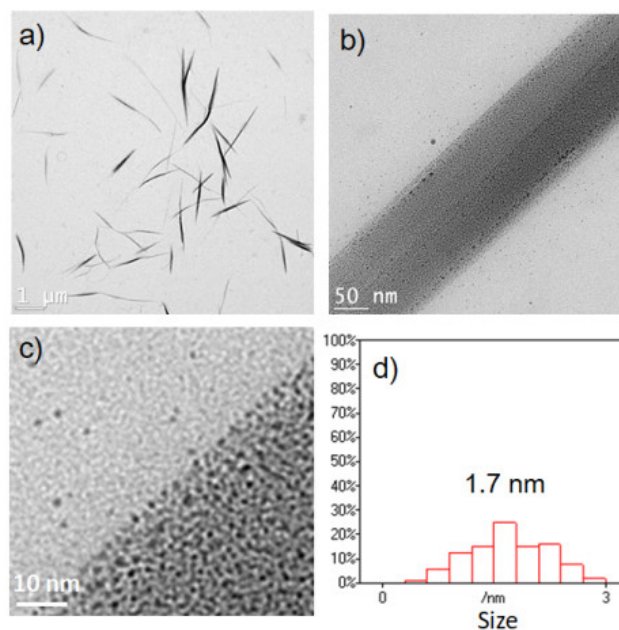

**Supplementary Fig. 18** (a-c) Typical TEM images of Ag-AgMOM and (d) the size distribution histogram of AgNPs synthesized under the conditions of  $m_{\text{Ag}^+}/m_{\text{TCPP}}=1:1$ , reaction time of 28 h and with the introduction of 200  $\mu\text{L}$  TFA.

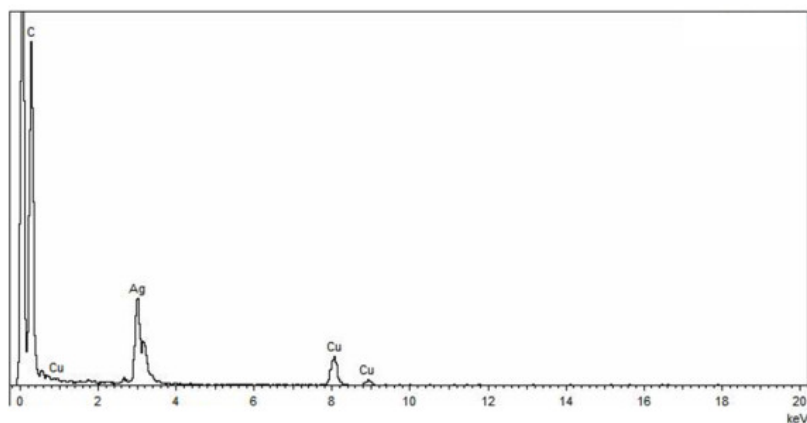

**Supplementary Fig. 19** EDS spectrum of Ag-AgMOM synthesized under the conditions of  $m_{\text{Ag}^+}/m_{\text{TCPP}}=1:1$ , reaction time of 28 h and with the addition of 200  $\mu\text{L}$  TFA (Cu comes from the TEM grid).

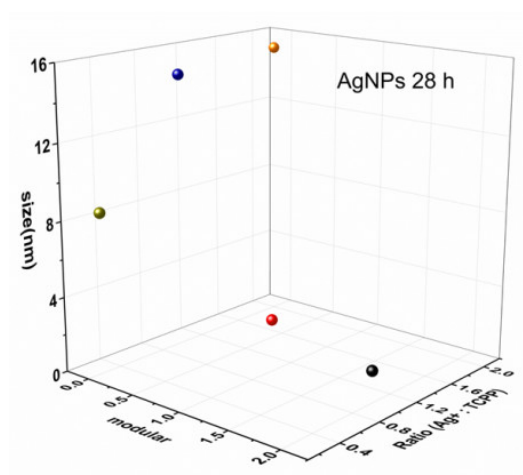

**Supplementary Fig. 20** The statistically average size of AgNPs on MOM synthesized under different feeding ratios of  $m_{\text{Ag}^+}$  to  $m_{\text{TCPP}}$  and amounts of TFA at the same reaction time of 28 h.

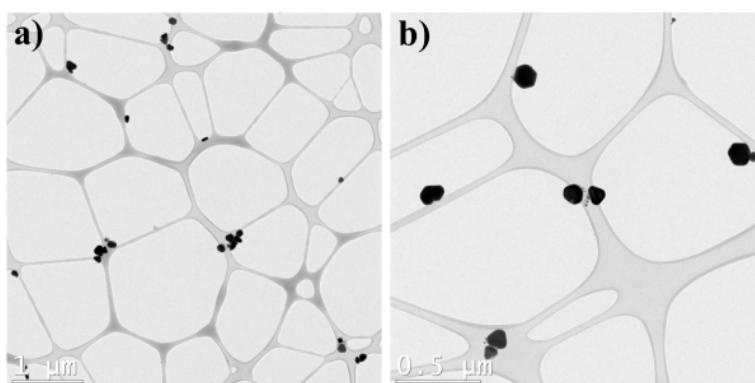

**Supplementary Fig. 21** (a,b) Typical TEM images of Ag nanocubes, which was synthesized under the same condition as that of Ag-AgMOM (28 h), except for the absence of TCPP ligands.

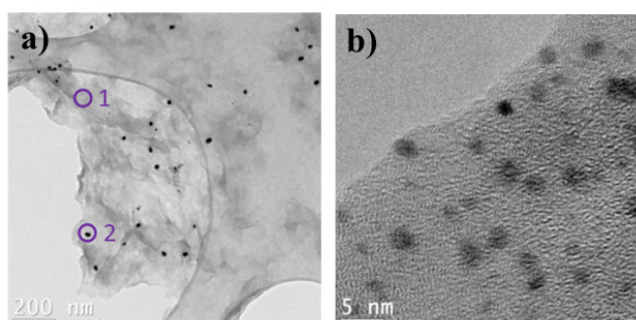

**Supplementary Fig. 22** (a,b) Typical TEM images of Ag-CuMOM synthesized under the conditions of  $m_{\text{Cu}^{2+}}/m_{\text{Ag}^+}/m_{\text{TCPP}}=1:1:1$  and reaction time of 28 h. Circles 1 and 2 in (a) denote the areas from which EDS was taken, as shown below in Supplementary Fig.23.

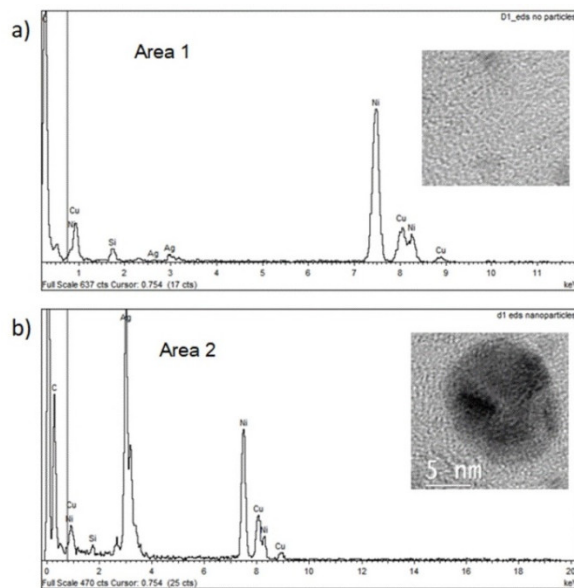

**Supplementary Fig. 23** EDS spectra of Ag-CuMOM taken from (a) the area 1 and (b) the area 2 in Supplementary Fig. 22 (a).

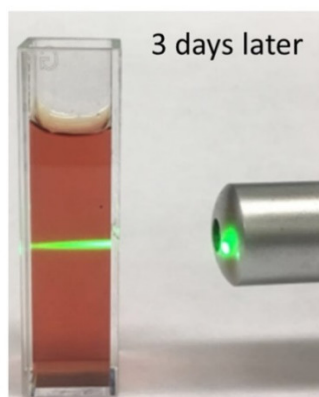

**Supplementary Fig. 24** Photograph of Ag-CuMOM in ethanol under green laser illumination.

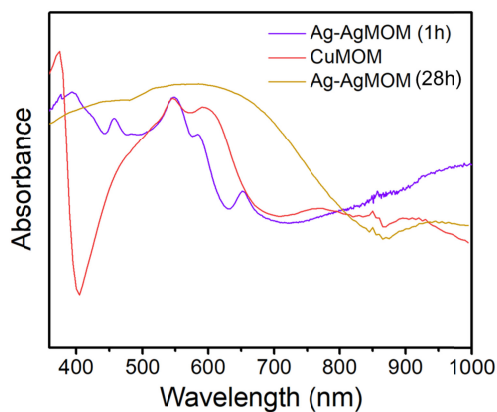

**Supplementary Fig. 25** UV-Vis spectra of solid CuMOM, Ag-AgMOM (1h) and Ag-AgMOM (28h).

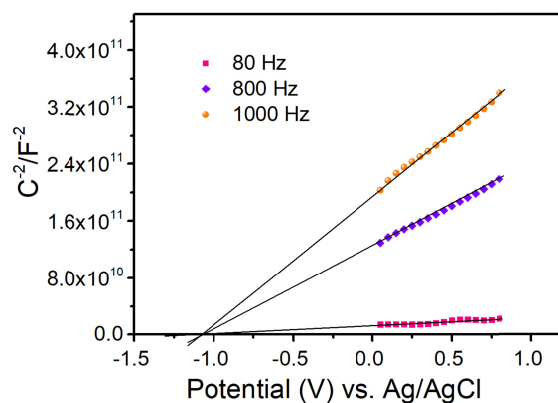

**Supplementary Fig. 26** Mott-Schottky plots of CuMOM.

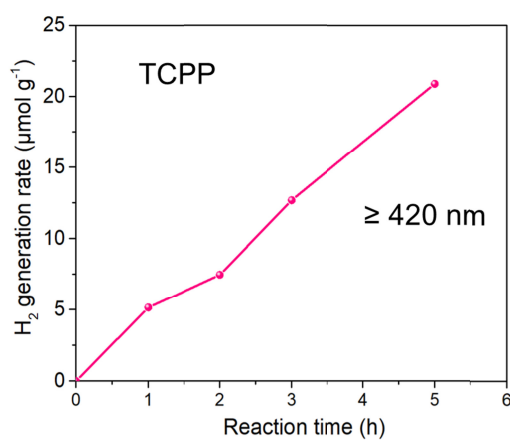

**Supplementary Fig. 27** Photocatalytic performance of TCPP under 300 W irradiation with a 420 nm long-pass filter ( $H_2$  generation rate:  $\sim 4 \mu\text{mol h}^{-1} \text{g}^{-1}$ ).

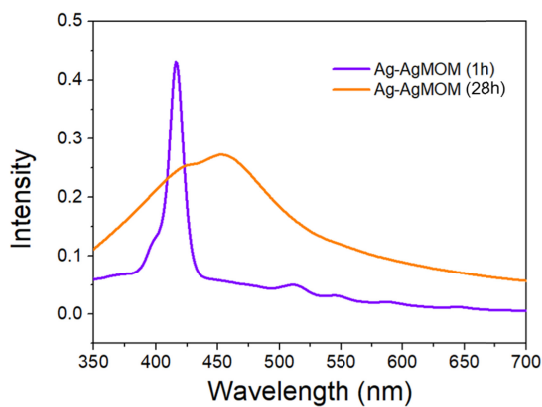

**Supplementary Fig. 28** UV-Vis absorption spectra of Ag-AgMOM (28h) and Ag-AgMOM (1h) in ethanol solution.

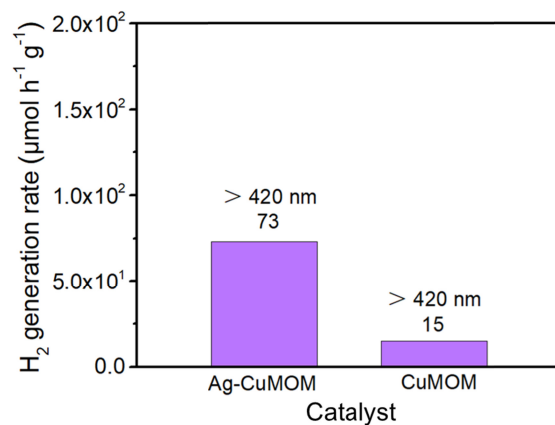

**Supplementary Fig. 29** Hydrogen generation rate under 300 W irradiation with a 420 nm long-pass filter and in the presence of Ag-CuMOM and CuMOM, respectively.

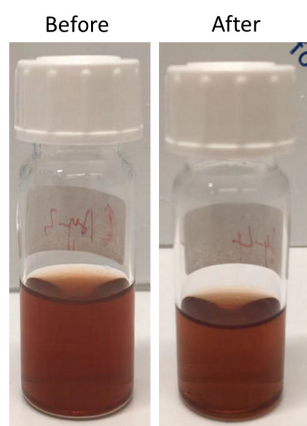

**Supplementary Fig. 30** Photographs of Ag-AgMOM in solution before and after photocatalytic reaction.

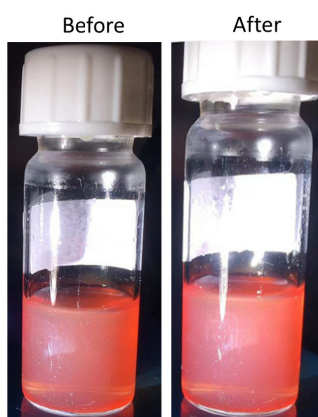

**Supplementary Fig. 31** Photographs of Ag-AgMOM in solution under Xe lamp light irradiation before and after photocatalytic reaction.

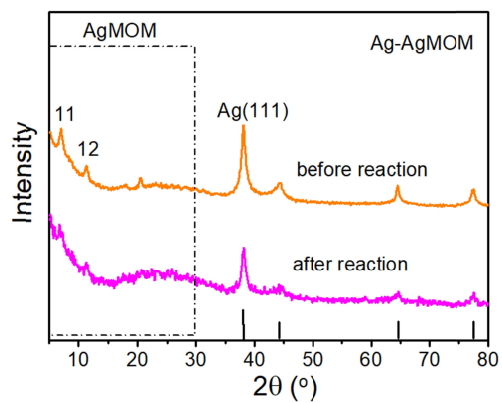

**Supplementary Fig. 32** PXRD patterns of the Ag-AgMOM before and after photocatalytic reaction.

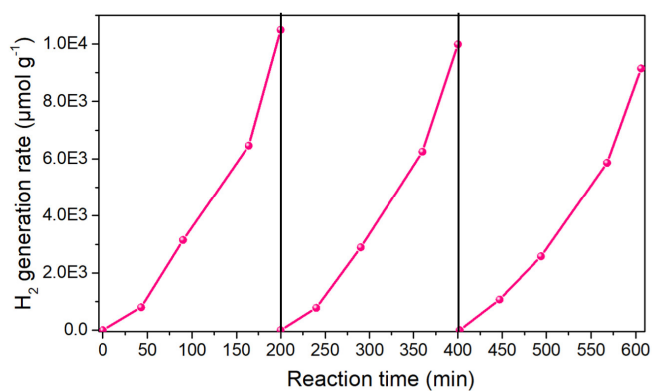

**Supplementary Fig. 33** Three cycles of photocatalytic performance of Ag-AgMOM.

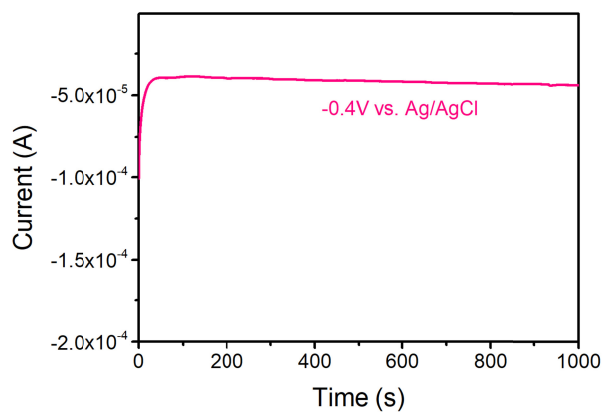

**Supplementary Fig. 34** Photocurrent stability of Ag-AgMOM at a bias of -0.4 V vs. Ag/AgCl.

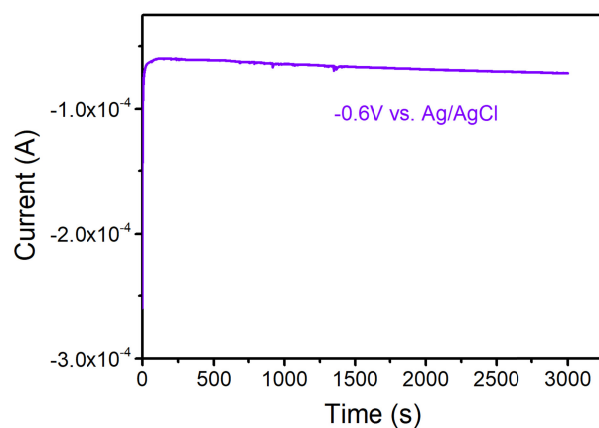

**Supplementary Fig. 35** Photocurrent stability of Ag-AgMOM at a bias of -0.6 vs. Ag/AgCl.

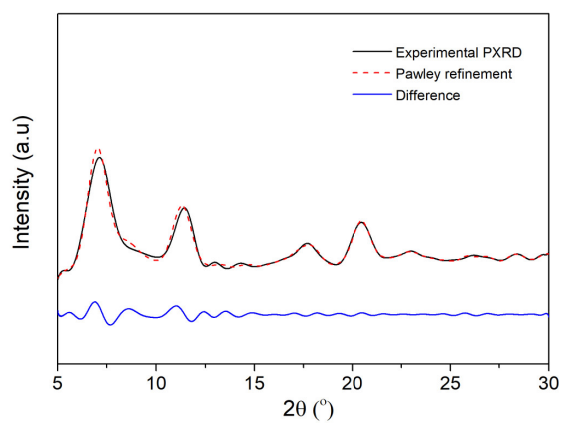

**Supplementary Fig. 36** Pawley refinement of experimental PXRD of Ag-AgMOM comparing with the simulated model in the range from 2-30° ( $R_{wp} = 5.20\%$  and  $R_p = 3.84\%$ ).

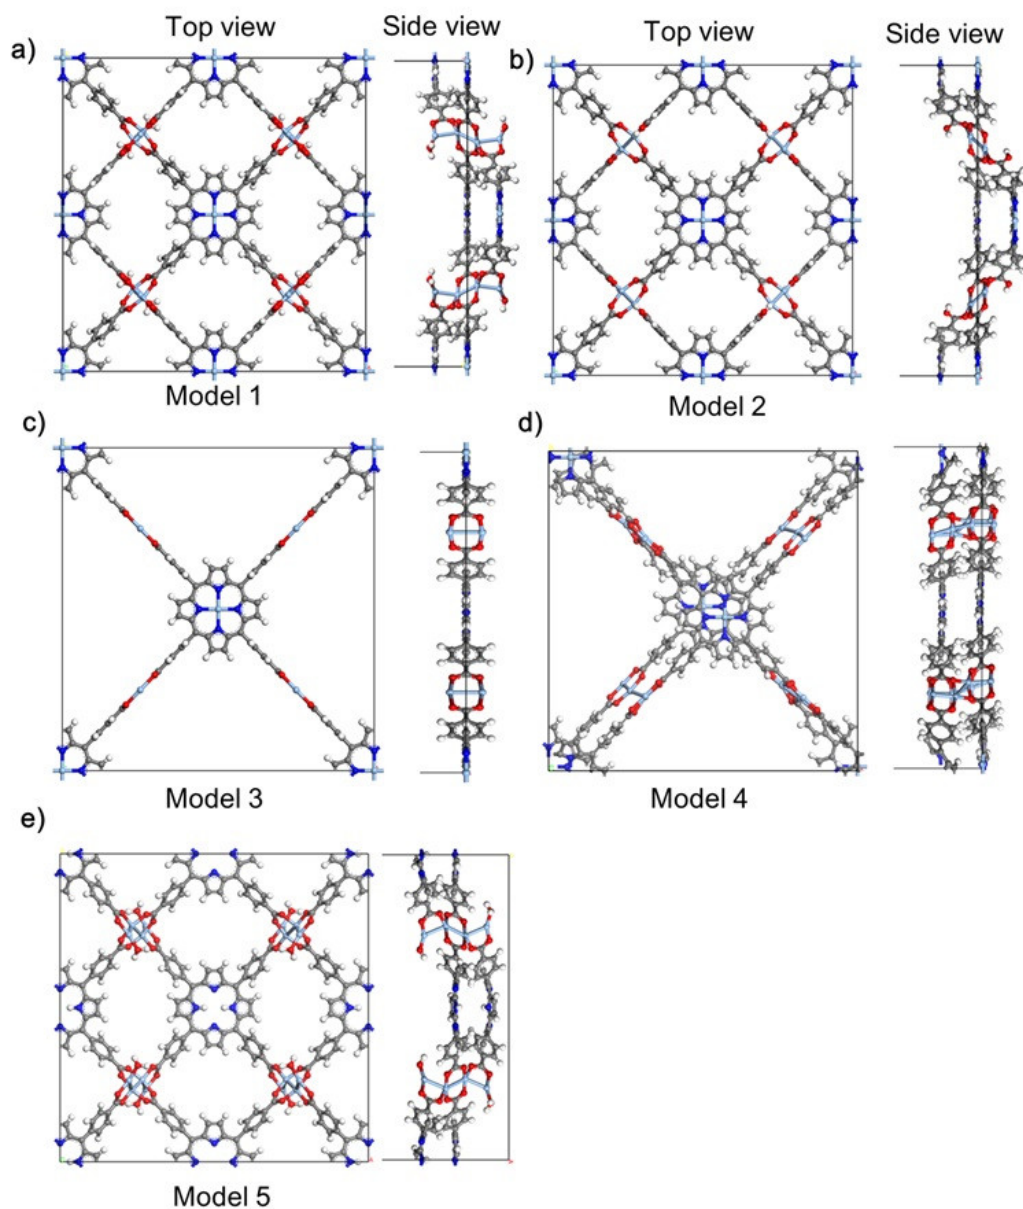

**Supplementary Fig. 37** (a-e) More models optimized and considered for AgMOM. None of them have simulated PXRD patterns matching with the experimental PXRD pattern. While the simulation results of our model may also present a little mismatch with experimental data, same as most simulated PXRD<sup>2,3</sup>, it is self-consistent and provides an overarching explanation to the observed phenomena.



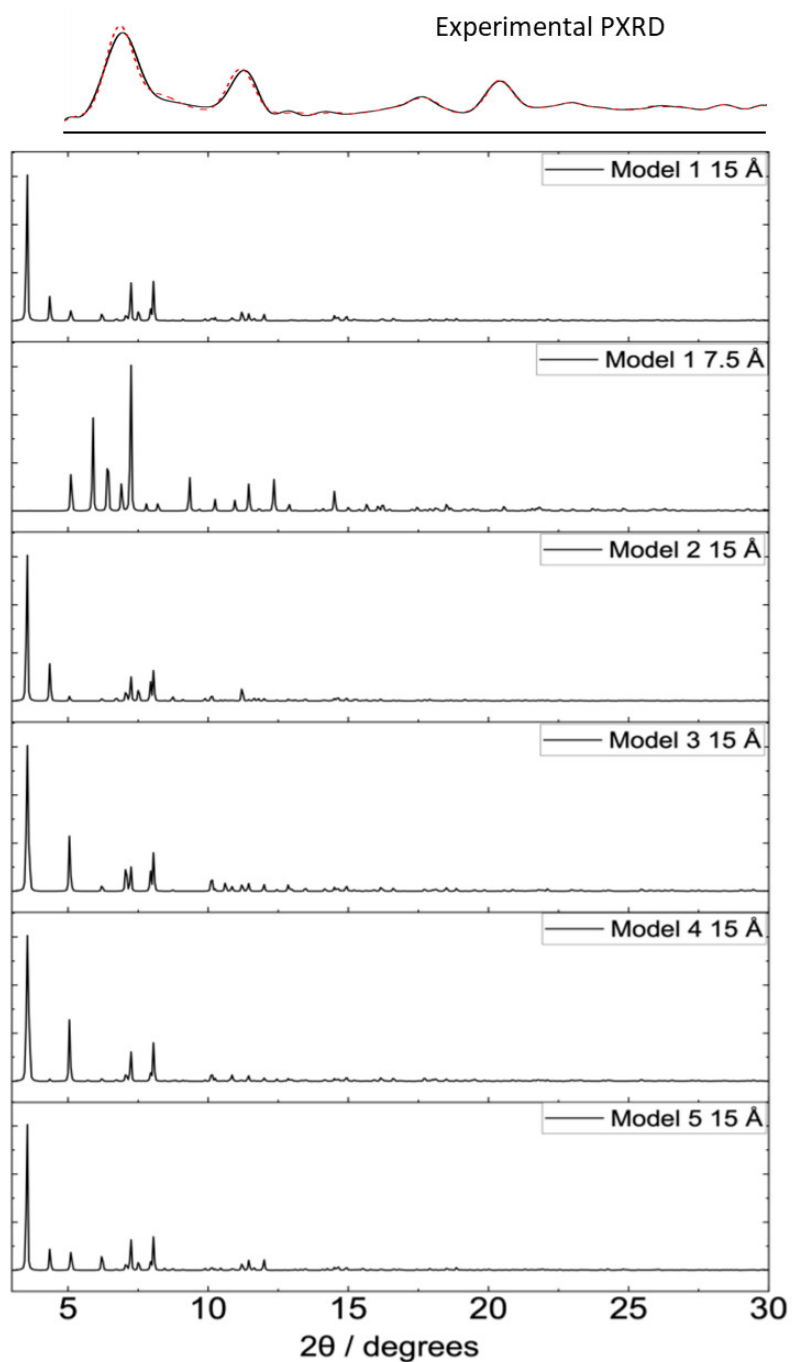

**Supplementary Fig. 38** Experimental PXR (the top one) and simulated PXR patterns of the other models shown in Supplementary Fig. 37, under the assumption of AA-stacking with c-distance indicated in the legend.

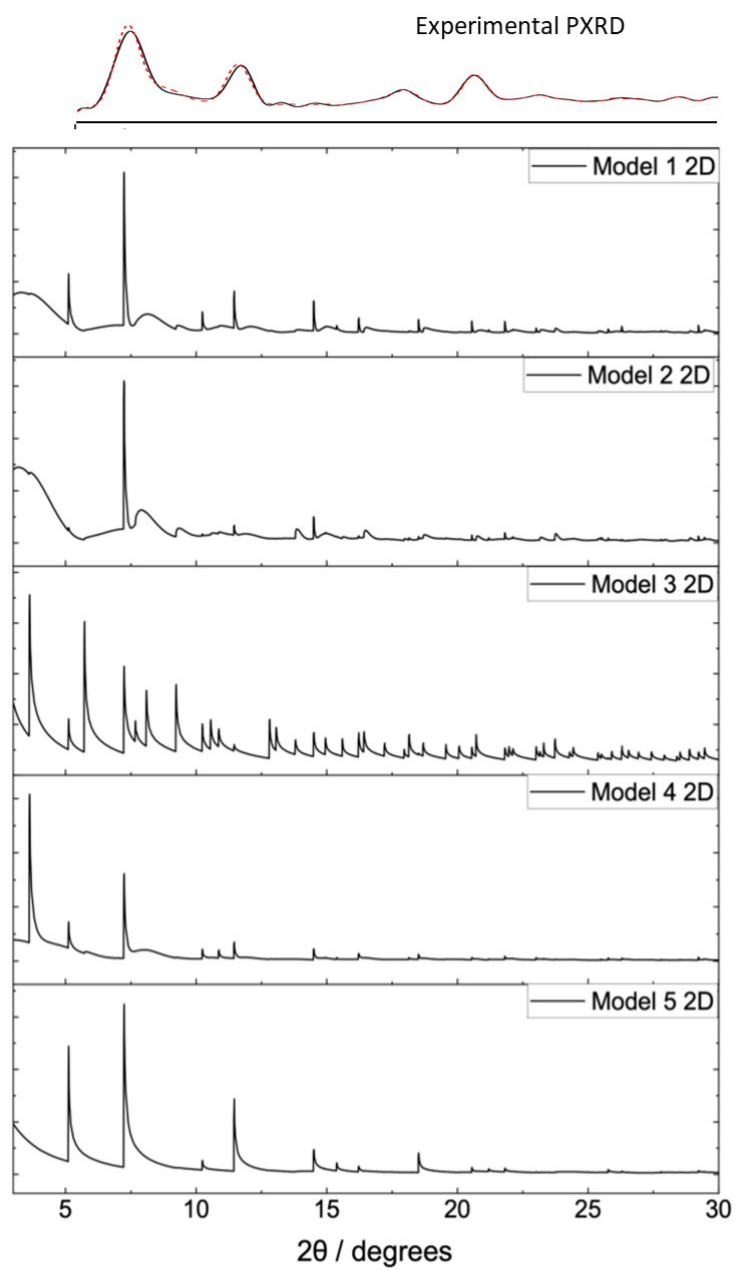

**Supplementary Fig. 39** Experimental PXR (the top one) and simulated 2D PXR patterns of the other models shown in Supplementary Fig. 37.

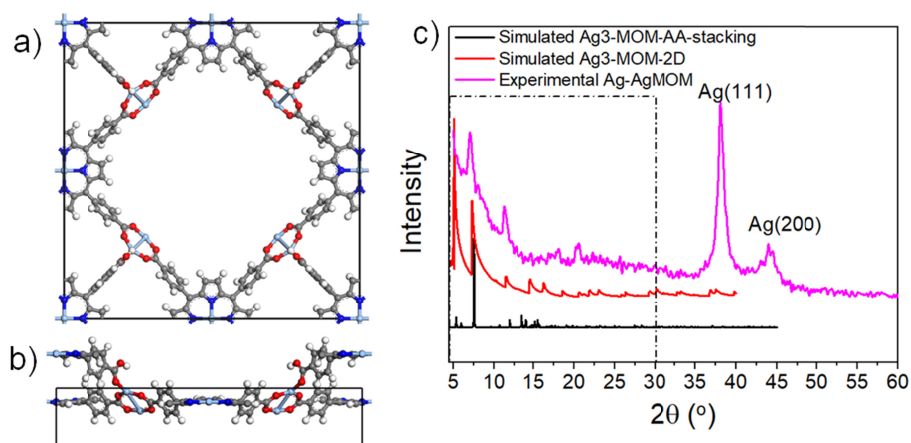

**Supplementary Fig. 40** (a) Top view and (b) side view of a model of two silver atoms bonded per three carboxylates considered for AgMOM. (c) The simulated PXR patterns in AA-stacked and in 2D comparing with the experimental PXR pattern of Ag-AgMOM.

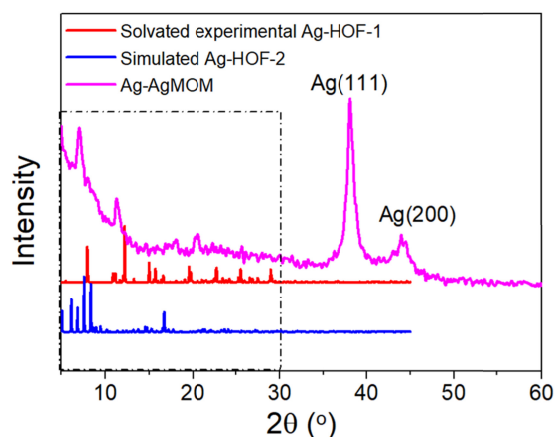

**Supplementary Fig. 41** The simulated PXR patterns of solvated experimental Ag-TCPP hydrogen-bonded structure (Ag-HOF-1 reported in *J. Porphyrins Phthalocyanines* **14**, 804 (2010).) and simulated Ag-HOF-2 comparing with the experimental PXR pattern of Ag-AgMOM.

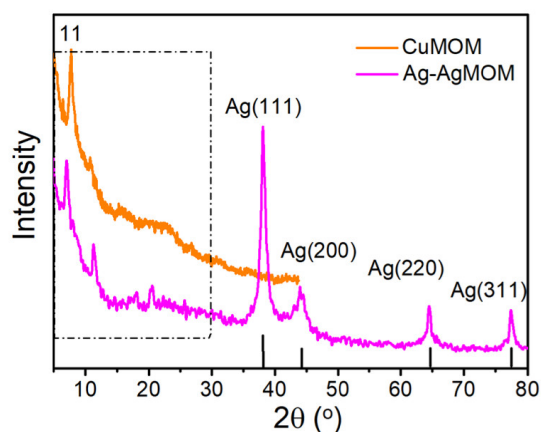

**Supplementary Fig. 42** PXR pattern comparison between Ag-AgMOM and CuMOM.

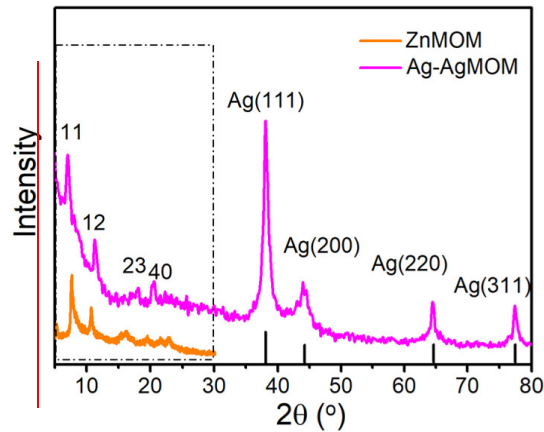

**Supplementary Fig. 43** PXR D pattern comparison between Ag-AgMOM and ZnMOM.

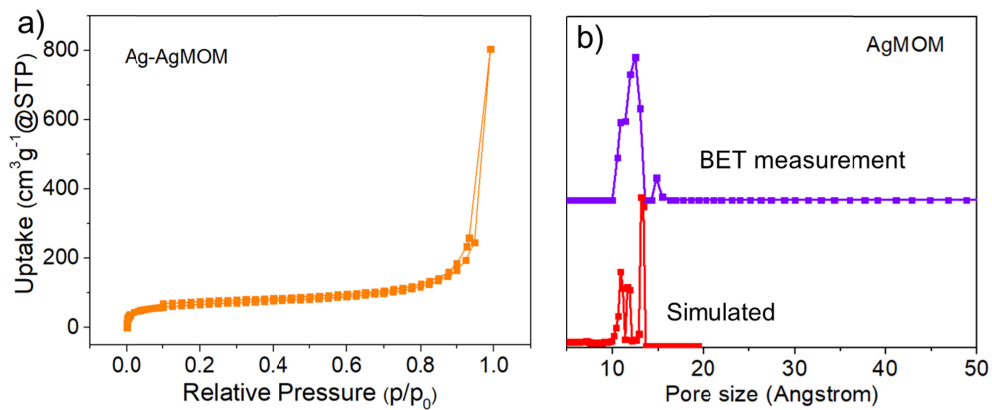

**Supplementary Fig. 44** (a) N<sub>2</sub> adsorption and desorption isotherm curves of Ag-AgMOM. (b) The simulated pore size distribution curve of AgMOM and pore size distribution profile from BET experiment of Ag-AgMOM.

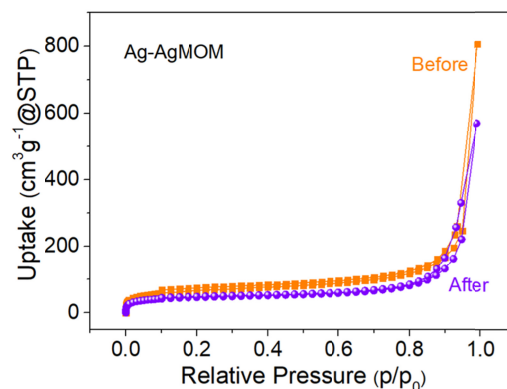

**Supplementary Fig. 45** N<sub>2</sub> adsorption and desorption isotherm curves before and after photocatalysis under full spectrum light irradiations.

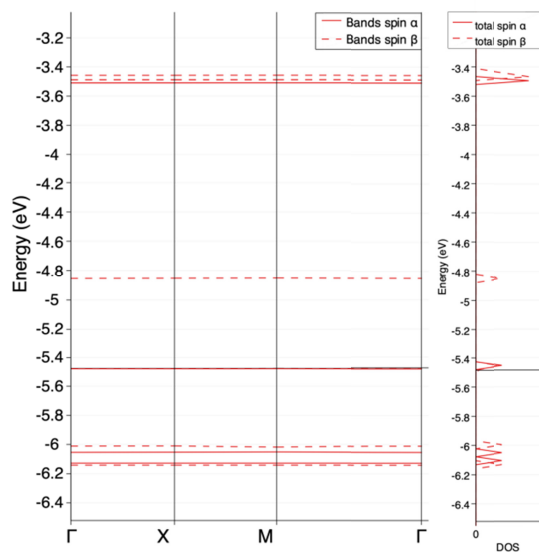

**Supplementary Fig. 46** Calculated band structure and total density of states (TDOS) of AgMOM.

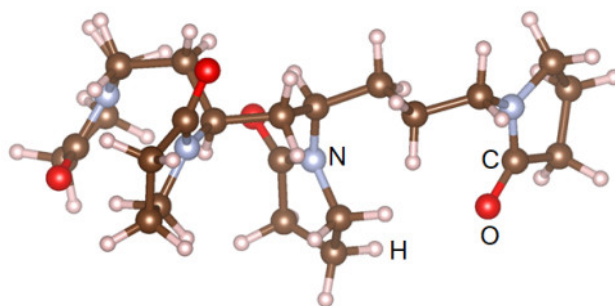

**Supplementary Fig. 47** Molecular model of simplified PVP (n=4).

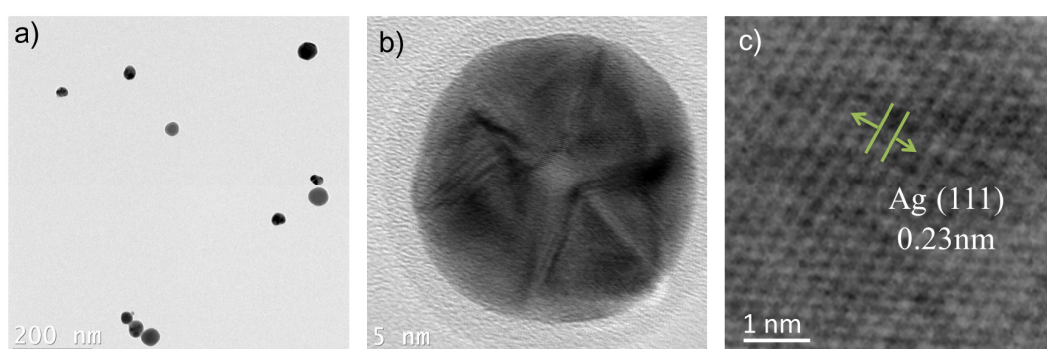

**Supplementary Fig. 48** (a) TEM image of AgNPs. (b) TEM image of a single AgNP, where the surfactant layer on the surface can be observed. (c) HR-TEM image of a AgNP clearly showing lattice fringes with the spacing of 0.23 nm, in line with the Ag (111) crystal planes.

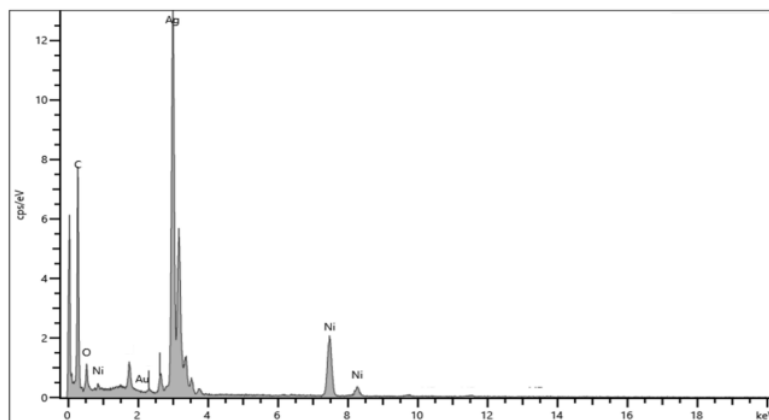

**Supplementary Fig. 49** EDS spectrum of AgNPs (Ni comes from the TEM grid).

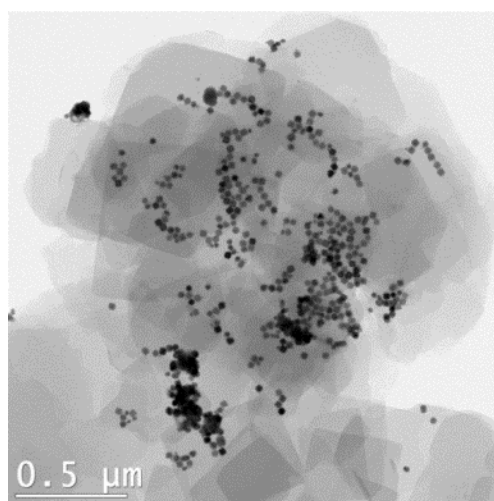

**Supplementary Fig. 50** TEM image of Ag-CuMOM.

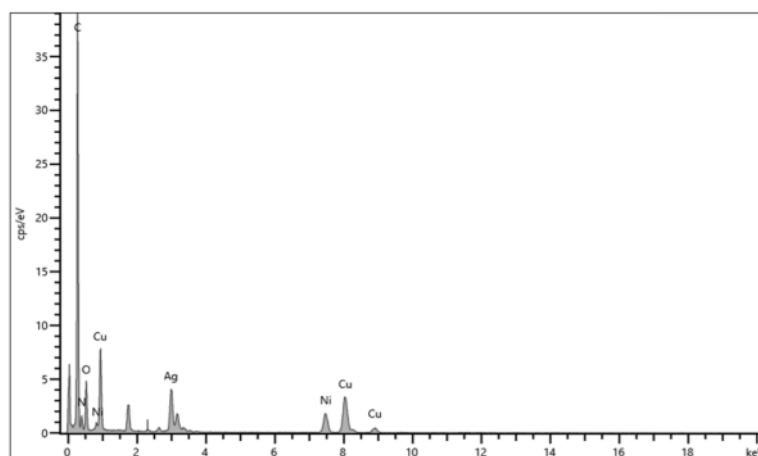

**Supplementary Fig. 51** EDS spectrum of Ag-CuMOM.

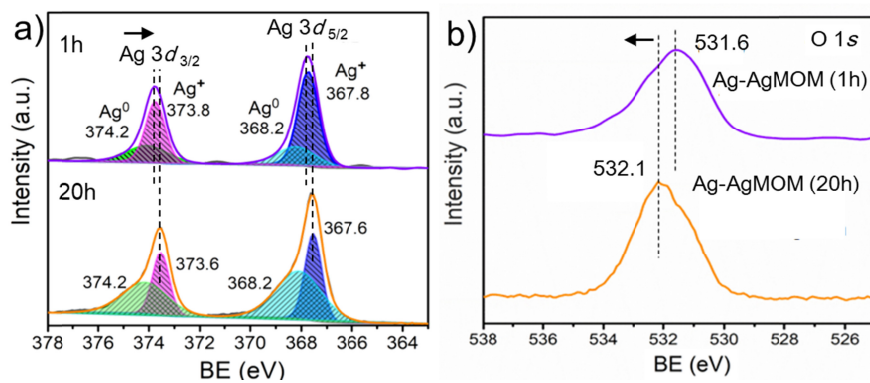

**Supplementary Fig. 52** XPS peaks of (a) Ag 3d<sub>3/2</sub>, Ag 3d<sub>5/2</sub> and (b) O 1s in Ag-AgMOM synthesized at the reaction time of 1h and 20h (BE: binding energy).

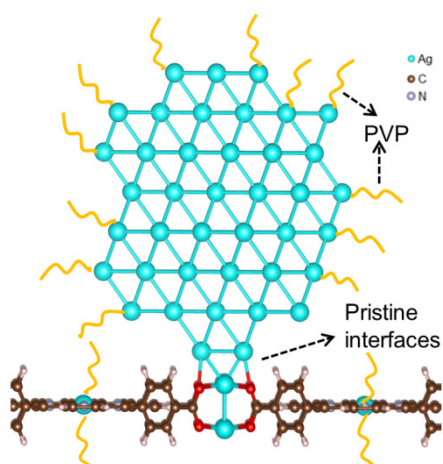

**Supplementary Fig. 53** Side view of the model of one Ag NP linked with porphyrin AgMOM.

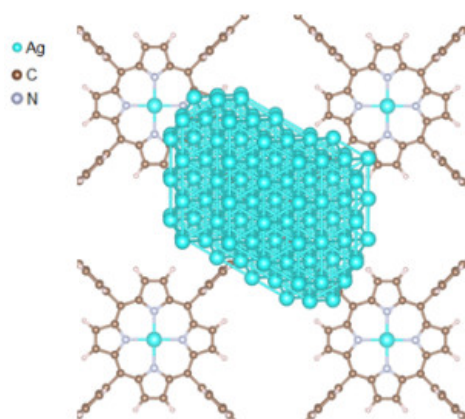

**Supplementary Fig. 54** Top view of the model of one Ag NP linked with porphyrin AgMOM.

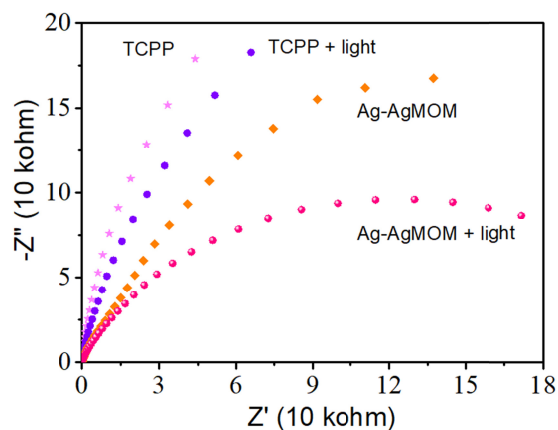

**Supplementary Fig. 55** EIS spectra of TCPP and Ag-AgMOM under light or dark conditions.

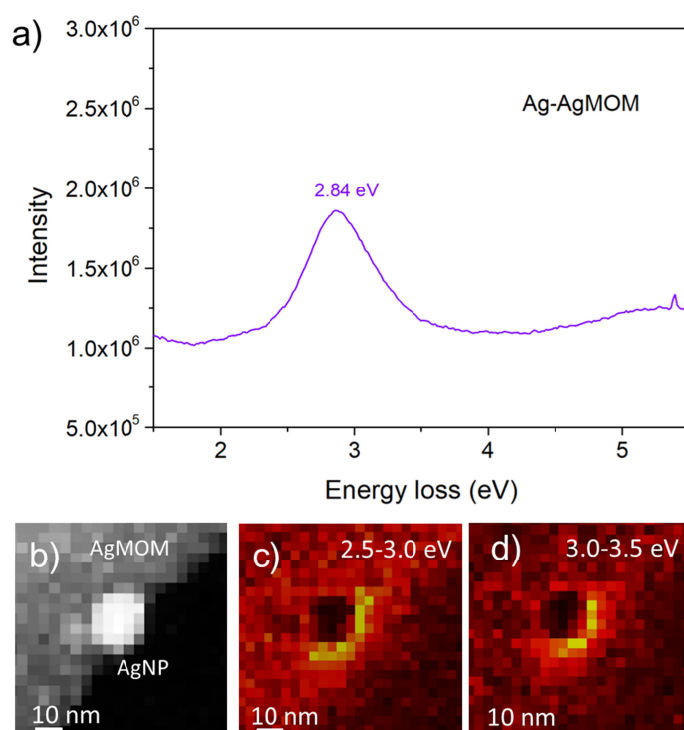

**Supplementary Fig. 56** (a) EELS spectrum of Ag-AgMOM after background subtraction (zero-loss tail was removed). (b) HAADF-STEM image of Ag-AgMOM. (c,d) Plasmon mapping of Ag-AgMOM in two different energy ranges.



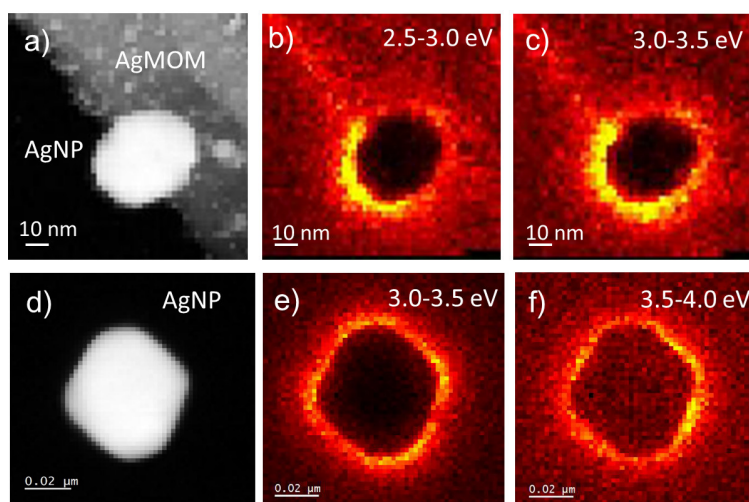

**Supplementary Fig. 57** (a) HAADF-STEM image of Ag-AgMOM. (b,c) Plasmon mapping of Ag-AgMOM in two different energy ranges. (d) HAADF-STEM image of AgNP. (e,f) Plasmon mapping of AgNP in two different energy ranges. Here, pure AgNP and AgNP on AgMOM have a similar size of ca. 40 nm, larger than that shown in Supplementary Fig. 51.

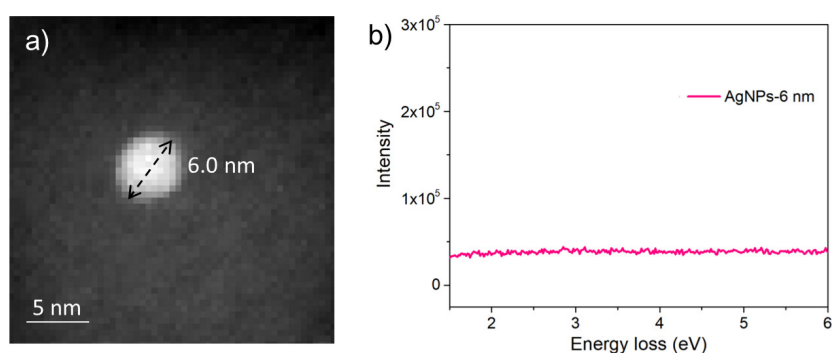

**Supplementary Fig. 58** (a) HAADF-STEM image of a representative small AgNP (6 nm) and (b) corresponding low-loss EELS spectrum after background subtraction.

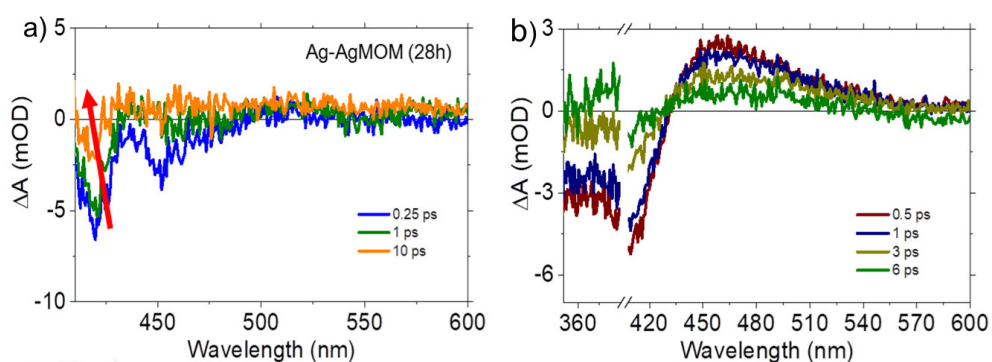

**Supplementary Fig. 59.** (a) Femtosecond transient absorption spectra at selected time delays of the Ag-AgMOM (28h) sample, taken with a pump wavelength of 400 nm. (b) Femtosecond transient

absorption spectra at selected time delays (0.5, 1, 3 and 6 ps) of AgNPs (strong 400 nm pump scattering data in the range of 389-407 nm was removed for better representation).

We infer that the strong overlap between the negative and positive A signals (in the ranges of ca. 415-424 nm and ca. 430-440 nm, respectively) caused the blue shifts, with respect to the steady-state absorption peak, along with the probe delay time. The small and positive induced absorption signal between 430-440 nm may be hidden under the strong bleaching features centered at 415 nm and 458 nm at an early time delay (<1 ps). As both the bleaching recovers partially at the 10 ps time scale, the appearance of the absorption signal between 430-440 nm becomes clear. It means that the absorption signal between 430-440 nm should also be present at <1 ps, but we cannot resolve it due to strongly overlapping signals.

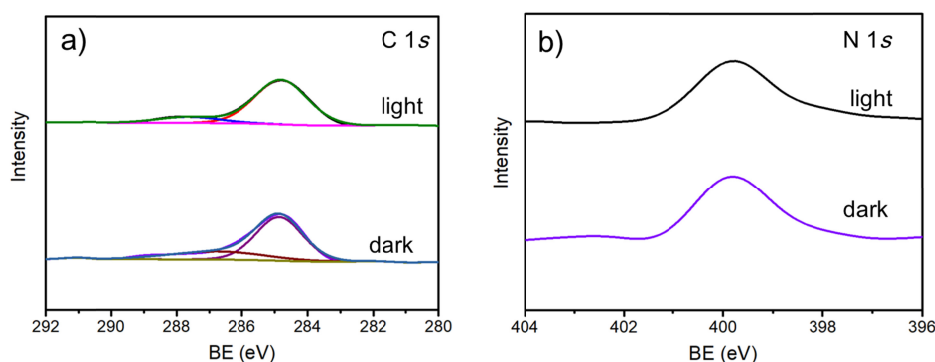

**Supplementary Fig. 60** High-resolution XPS spectra for (a) C 1s and (b) N 1s of Ag-AgMOM (4h) with or without 420 nm LED irradiation (BE: binding energy).

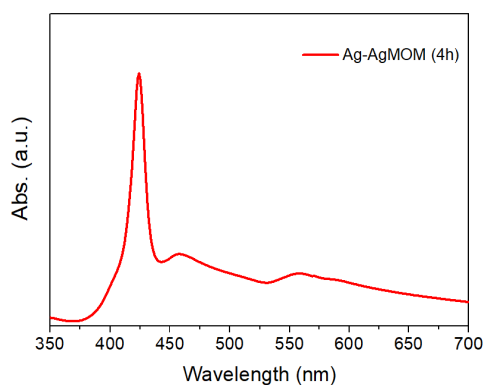

**Supplementary Fig. 61** UV-Vis absorption spectrum of Ag-AgMOM (4h) in ethanol solution.

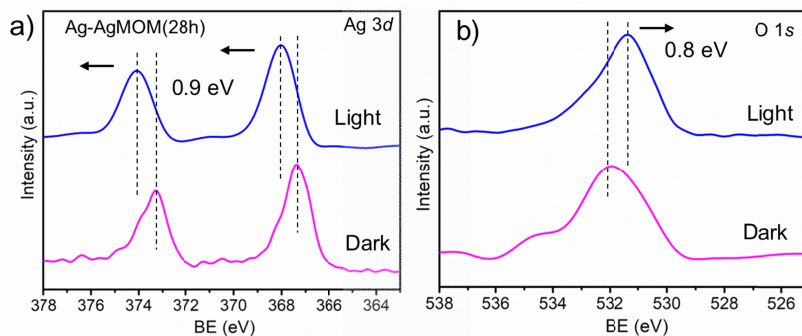

**Supplementary Fig. 62** High-resolution XPS spectra for (a) Ag 3d and (b) O 1s of Ag-AgMOM (28h) with or without 420 nm LED irradiation.

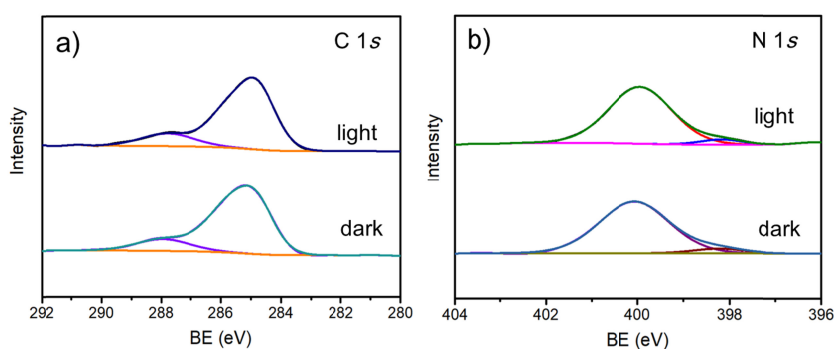

**Supplementary Fig. 63** High-resolution XPS spectra for (a) C 1s and (b) N 1s of Ag-AgMOM (28h) with or without 420 nm LED irradiation.

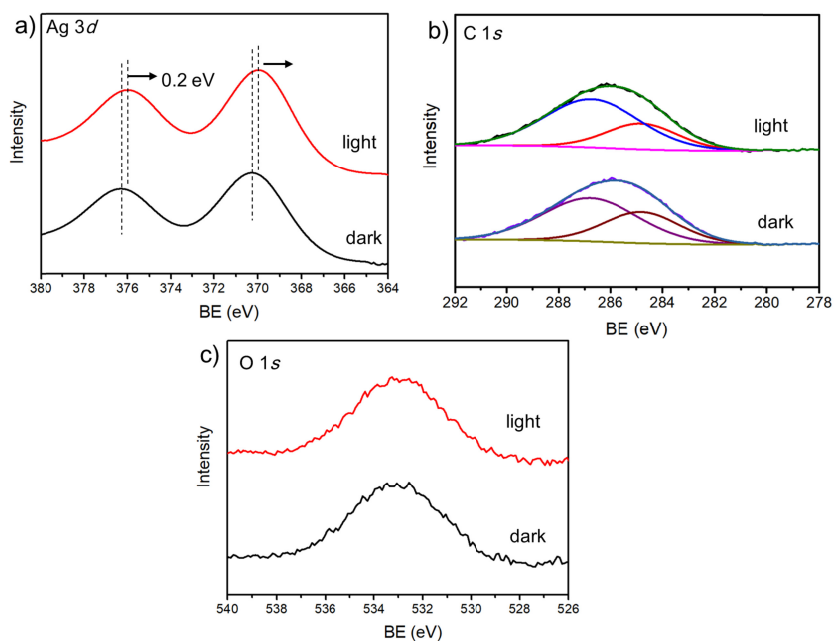

**Supplementary Fig. 64** High-resolution XPS spectra for (a) Ag 3d, (b) C 1s and (c) O 1s of AgNPs with or without 420 nm LED irradiation.

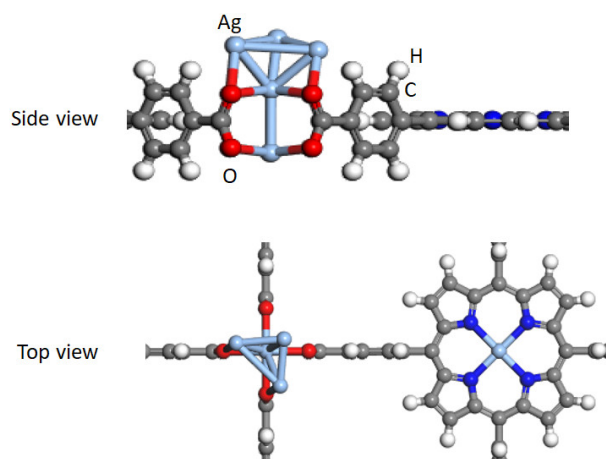

**Supplementary Fig. 65** Top and side view of the Ag<sub>3</sub>-MOM model.

**Supplementary Table 1** CBM and VBM positions of CuMOM and Ag-AgMOM.

|                 | <b>Band gap</b> | <b>CBM (vs. NHE)</b> | <b>VBM (vs. NHE)</b> |
|-----------------|-----------------|----------------------|----------------------|
| <b>CuMOM</b>    | 1.87 eV         | -0.46 eV             | 1.43 eV              |
| <b>Ag-AgMOM</b> | 1.59 eV         | -1.01 eV             | 0.58 eV              |

**Supplementary Table 2** Metal-organic material (including MOFs) - based photocatalytic hydrogen generation.

| <b>Photocatalyst</b>                         | <b>H<sub>2</sub> generation rate (μmol g<sup>-1</sup> h<sup>-1</sup>)</b> | <b>Sacrificial reagent</b> | <b>Solvent</b>                                        | <b>Reference No.</b> |
|----------------------------------------------|---------------------------------------------------------------------------|----------------------------|-------------------------------------------------------|----------------------|
| <b>Pt@MIL-125/Au</b>                         | 1743.0<br>(380-800 nm)                                                    | TEOA                       | 18 mL CH <sub>3</sub> CN<br>+ 0.3 mL water            | 4                    |
| <b>NH<sub>2</sub> -UiO-66/Pt</b>             | 2230 (370-800 nm)                                                         | No mention                 | H <sub>2</sub> O/methanol<br>3:1                      | 5                    |
| <b>Pt@UiO-66-NH<sub>2</sub></b>              | 257.38                                                                    | TEOA                       | 18 mL CH <sub>3</sub> CN<br>+ 0.2 mL H <sub>2</sub> O | 6                    |
| <b>Co<sub>2</sub>@MIL-125-NH<sub>2</sub></b> | 553                                                                       | TEA                        | 27.6 mL CH <sub>3</sub> CN                            | 7                    |

|                                                                                  |                   |             |                                                         |    |
|----------------------------------------------------------------------------------|-------------------|-------------|---------------------------------------------------------|----|
|                                                                                  |                   |             | + 1 mL H <sub>2</sub> O                                 |    |
| <b>UCNPs-Pt@MOM/Au</b>                                                           | 280               | TEOA        | 18 mL CH <sub>3</sub> CN<br>+ 0.2 mL H <sub>2</sub> O   | 8  |
| <b>Al-TCPP-0.1Pt</b>                                                             | 129               | TEOA        | 18 mL CH <sub>3</sub> CN<br>+<br>1 mL H <sub>2</sub> O  | 9  |
| <b>Pt/PCN-777</b>                                                                | 586               | benzylamine | 5 mL DMF+50<br>L H <sub>2</sub> O                       | 10 |
| <b>HNTM-Ir/Pt</b>                                                                | 201.9             | TEOA        | 45 mL CH <sub>3</sub> CN<br>+1 mL H <sub>2</sub> O      | 11 |
| <b>CdS@ZAVCI-MOM</b>                                                             | 420               | ethanol     | 9.25 mL H <sub>2</sub> O                                | 12 |
| <b>Ni<sub>4</sub>P<sub>2</sub>@MOM</b>                                           | 4400(≥ 400<br>nm) | methanol    | H <sub>2</sub> O (pH 1.2)                               | 13 |
| <b>{[Cu<sup>I</sup> Cu<sup>II</sup><sub>2</sub><br/>-(DCTP)<sub>2</sub>] MOM</b> | 32                | methanol    | 90 mL H <sub>2</sub> O                                  | 14 |
| <b>Al-TCPP(Zn )/Pt</b>                                                           | 200               | MeOH        | H <sub>2</sub> O                                        | 15 |
| <b>Fe<sub>2</sub> (μ-dcbdt)( CO)<sub>6</sub><br/>/Ru (bpy)<sub>3</sub></b>       | 280               | No mention  | 1 M acetate<br>buffer (pH 5)                            | 16 |
| <b>Ni<sub>2</sub>P@UiO-66-NH<sub>2</sub></b>                                     | 409.1             | TEA         | 20 mL CH <sub>3</sub> CN<br>+ 0.2 mL<br>deionized water | 17 |
| <b>Mo<sub>3</sub>S<sub>13</sub><sup>2-</sup>/MIL-125-NH<sub>2</sub></b>          | 2094 (≥420 nm)    | TEA         | CH <sub>3</sub> CN:H <sub>2</sub> O<br>(79.0:4.9 v/v)   | 18 |
| <b>Ni<sub>2</sub>P/MIL-125-NH<sub>2</sub></b>                                    | 1230 (≥420 nm)    | TEA         | 0.8 mL H <sub>2</sub> O +<br>13.4 mL CH <sub>3</sub> CN | 19 |
| <b>Pt1/SnO<sub>2</sub>/UiO-66-NH<sub>2</sub></b>                                 | 2167 (>380 nm)    | TEA         | 4.5 mL CH <sub>3</sub> CN +<br>100 μL H <sub>2</sub> O  | 20 |
| <b>Al/Zn-PMOF</b>                                                                | 200               | EDTA        | methyl viologen                                         | 21 |

|                 |                       |      |                  |           |
|-----------------|-----------------------|------|------------------|-----------|
|                 |                       |      | solution         |           |
| <b>Ag-AgMOM</b> | 1025 ( $\geq 420$ nm) | TEOA | H <sub>2</sub> O | This work |
| <b>Ag-AgMOM</b> | 3153 ( $\geq 360$ nm) | TEOA | H <sub>2</sub> O | This work |

**Supplementary Table 3** Ag  $3d_{3/2}$  and  $3d_{5/2}$  XPS peak positions and peak area ratio of Ag<sup>0</sup>-to-Ag ion in Ag-AgMOM (1h) and Ag-AgMOM (20h), which were obtained at the reaction time of 1h and 20h, respectively.

|                       | Ag <sup>0</sup> $3d_{3/2}$<br>(eV) | Ag <sup>0</sup> $3d_{5/2}$<br>(eV) | Ag ion<br>$3d_{3/2}$ (eV) | Ag ion $3d_{5/2}$<br>(eV) | Ag <sup>0</sup> /Ag<br>ion |
|-----------------------|------------------------------------|------------------------------------|---------------------------|---------------------------|----------------------------|
| <b>Ag-AgMOM (1h)</b>  | 374.2                              | 368.2                              | 373.8                     | 367.8                     | 27/73                      |
| <b>Ag-AgMOM (20h)</b> | 374.2                              | 368.2                              | 373.6                     | 367.6                     | 68/32                      |

**Supplementary Table 4** Extended X-ray absorption fine structure (EXAFS) fitting results.

|                 | NO<br>(4)* | RO (Å)<br>(1.997 Å)* | N <sub>Ag</sub><br>(12)* | R <sub>Ag</sub> (Å)<br>(2.851 Å)* | $\sigma^2$ (Å <sup>2</sup> ) | E          |
|-----------------|------------|----------------------|--------------------------|-----------------------------------|------------------------------|------------|
| <b>Ag-AgMOM</b> | 0.8 ± 0.2  | 2.13 ± 0.02          | 4.1 ± 0.4                | 2.857 ± 0.007                     | 0.01 ± 0.001                 | -1.2 ± 0.8 |

Fitted value for  $S_0^2 = 0.85$ . \* reference numbers expected for AgO and Ag<sup>0</sup>. (NO: the coordination number of O; RO: the distance of O and adjacent atoms; N<sub>Ag</sub>: the coordination number of Ag; R<sub>Ag</sub>: the distance of O and adjacent atoms; Debye-Waller factor ( $\sigma^2$ ) and photoelectron energy origin (E)).

#### 4. Supplementary References.

- [1] Jiang, Y. *et al.* Simulating Powder X-ray Diffraction Patterns of Two-Dimensional Materials. *Inorg. Chem.* **57**, 15123-15132 (2018).
- [2] Wang, Z.-H., Wang, D.-F., Zhang, T., Huang, R.-B. & Zheng, L.-S. Synthesis, Characterization, Crystal Structures and Thermal and Photoluminescence Studies of Dimethylpyrazine-carboxylate Mixed Ligand Silver(I) Coordination Polymers with Various Multinuclear Silver Units. *CrystEngComm* **16**, 5028-5039 (2014).
- [3] Sun, D., Zhang, N., Huang, R.-B. & Zheng, L.-S. Series of Ag(I) Coordination Complexes Derived from Aminopyrimidyl Ligands and Dicarboxylates: Syntheses, Crystal Structures, and Properties. *Cryst. Growth Des.* **10**, 3699-3709 (2010).
- [4] Xiao, J.-D., Han, L., Luo, J., Yu, S.-H. & Jiang, H.-L. Integration of Plasmonic Effects and Schottky Junctions into Metal-Organic Framework Composites: Steering Charge Flow for Enhanced Visible-Light Photocatalysis. *Angew. Chem. Int. Ed.* **57**, 1103-1107 (2018).
- [5] Silva, C. G., Luz, I., LlabrésXamena, F. X., Corma, A. & García, H. Water Stable Zr-Benzenedicarboxylate Metal-Organic Frameworks as Photocatalysts for Hydrogen Generation. *Chem. Eur.* **16**, 11133-11138 (2010).
- [6] Xiao, J.-D. *et al.* Boosting Photocatalytic Hydrogen Production of a Metal-Organic Framework Decorated with Platinum Nanoparticles: The Platinum Location Matters. *Angew. Chem. Int. Ed.* **55**, 9389-9393 (2016).
- [7] Li, Z., Xiao, J.-D. & Jiang, H.-L. Encapsulating a Co(II) Molecular Photocatalyst in Metal-Organic Framework for Visible-Light-Driven H<sub>2</sub> Production: Boosting Catalytic Efficiency via Spatial Charge Separation. *ACS Catal.* **6**, 5359-5365 (2016).
- [8] Li, D., Yu, S.-H. & Jiang, H.-L. From UV to Near-Infrared Light-Responsive Metal-Organic Framework Composites: Plasmon and Upconversion Enhanced Photocatalysis. *Adv. Mater.* **30**, 1707377 (2018).
- [9] Fang, X. *et al.* Single Pt Atoms Confined into a Metal-Organic Framework for Efficient Photocatalysis. *Adv. Mater.* **30**, 1705112 (2018).
- [10] Liu, H., Xu, C., Li, D. & Jiang, H.-L. Photocatalytic Hydrogen Production Coupled with Selective Benzylamine Oxidation over MOF Composites. *Angew. Chem. Int. Ed.* **57**, 5379-5383 (2018).
- [11] He, T. *et al.* Zirconium-Porphyrin-Based Metal-Organic Framework Hollow Nanotubes for Immobilization of Noble-Metal Single Atoms. *Angew. Chem. Int. Ed.* **57**, 3493-3498 (2018).
- [12] Saha, S., Das, G., Thote, J. & Banerjee, R. Photocatalytic Metal-Organic Framework from CdS Quantum Dot Incubated Luminescent Metallohydrogel. *J. Am. Chem. Soc.* **136**, 14845-14851 (2014).

- [13] Kong, X.-J., Lin, Z., Zhang, Z.-M., Zhang, T. & Lin, W. Hierarchical Integration of Photosensitizing Metal–Organic Frameworks and Nickel-Containing Polyoxometalates for Efficient Visible-Light-Driven Hydrogen Evolution. *Angew. Chem. Int. Ed.* **55**, 6411-6416 (2016).
- [14] Wu, Z.-L. *et al.* A Semi-Conductive Copper–Organic Framework with Two Types of Photocatalytic Activity. *Angew. Chem. Int. Ed.* **55**, 4938-4942 (2016).
- [15] Fateeva, A. *et al.* A Water-Stable Porphyrin-Based Metal–Organic Framework Active for Visible-Light Photocatalysis. *Angew. Chem. Int. Ed.* **51**, 7440-7444 (2012).
- [16] Pullen, S., Fei, H., Orthaber, A., Cohen, S. M. & Ott, S. Enhanced Photochemical Hydrogen Production by a Molecular Diiron Catalyst Incorporated into a Metal–Organic Framework. *J. Am. Chem. Soc.* **135**, 16997-17003 (2013).
- [17] Sun, K. *et al.* Incorporating Transition-Metal Phosphides Into Metal-Organic Frameworks for Enhanced Photocatalysis. *Angew. Chem. Int. Ed.* **59**, 22749-22755 (2020).
- [18] Nguyen, T. N. *et al.* Photocatalytic Hydrogen Generation from a Visible-Light-Responsive Metal-Organic Framework System: Stability versus Activity of Molybdenum Sulfide Cocatalysts. *ACS Appl. Mater. Interfaces* **10**, 30035-30039 (2018).
- [19] Kampouri, S. *et al.* Concurrent Photocatalytic Hydrogen Generation and Dye Degradation Using MIL-125-NH<sub>2</sub> under Visible Light Irradiation. *Adv. Funct. Mater.* **28**, 1806368 (2018).
- [20] Sui, J. *et al.* A General Strategy to Immobilize Single-Atom Catalysts in Metal-Organic Frameworks for Enhanced Photocatalysis. *Adv. Mater.* **34**, e2109203 (2022).
- [21] Fateeva, A. *et al.* A Water-stable Porphyrin-based Metal-organic Framework Active for Visible-light Photocatalysis. *Angew. Chem. Int. Ed.* **51**, 7440–7444 (2012).
